# Supplementary material for: Diagnostic Value of Multiple Serum Biomarkers for Vancomycin-Induced Kidney Injury
Source: MDPI journal article supplement (doi:10.3390/jcm10215005), 2021-10-27
Supplement: s1 [file s1]

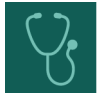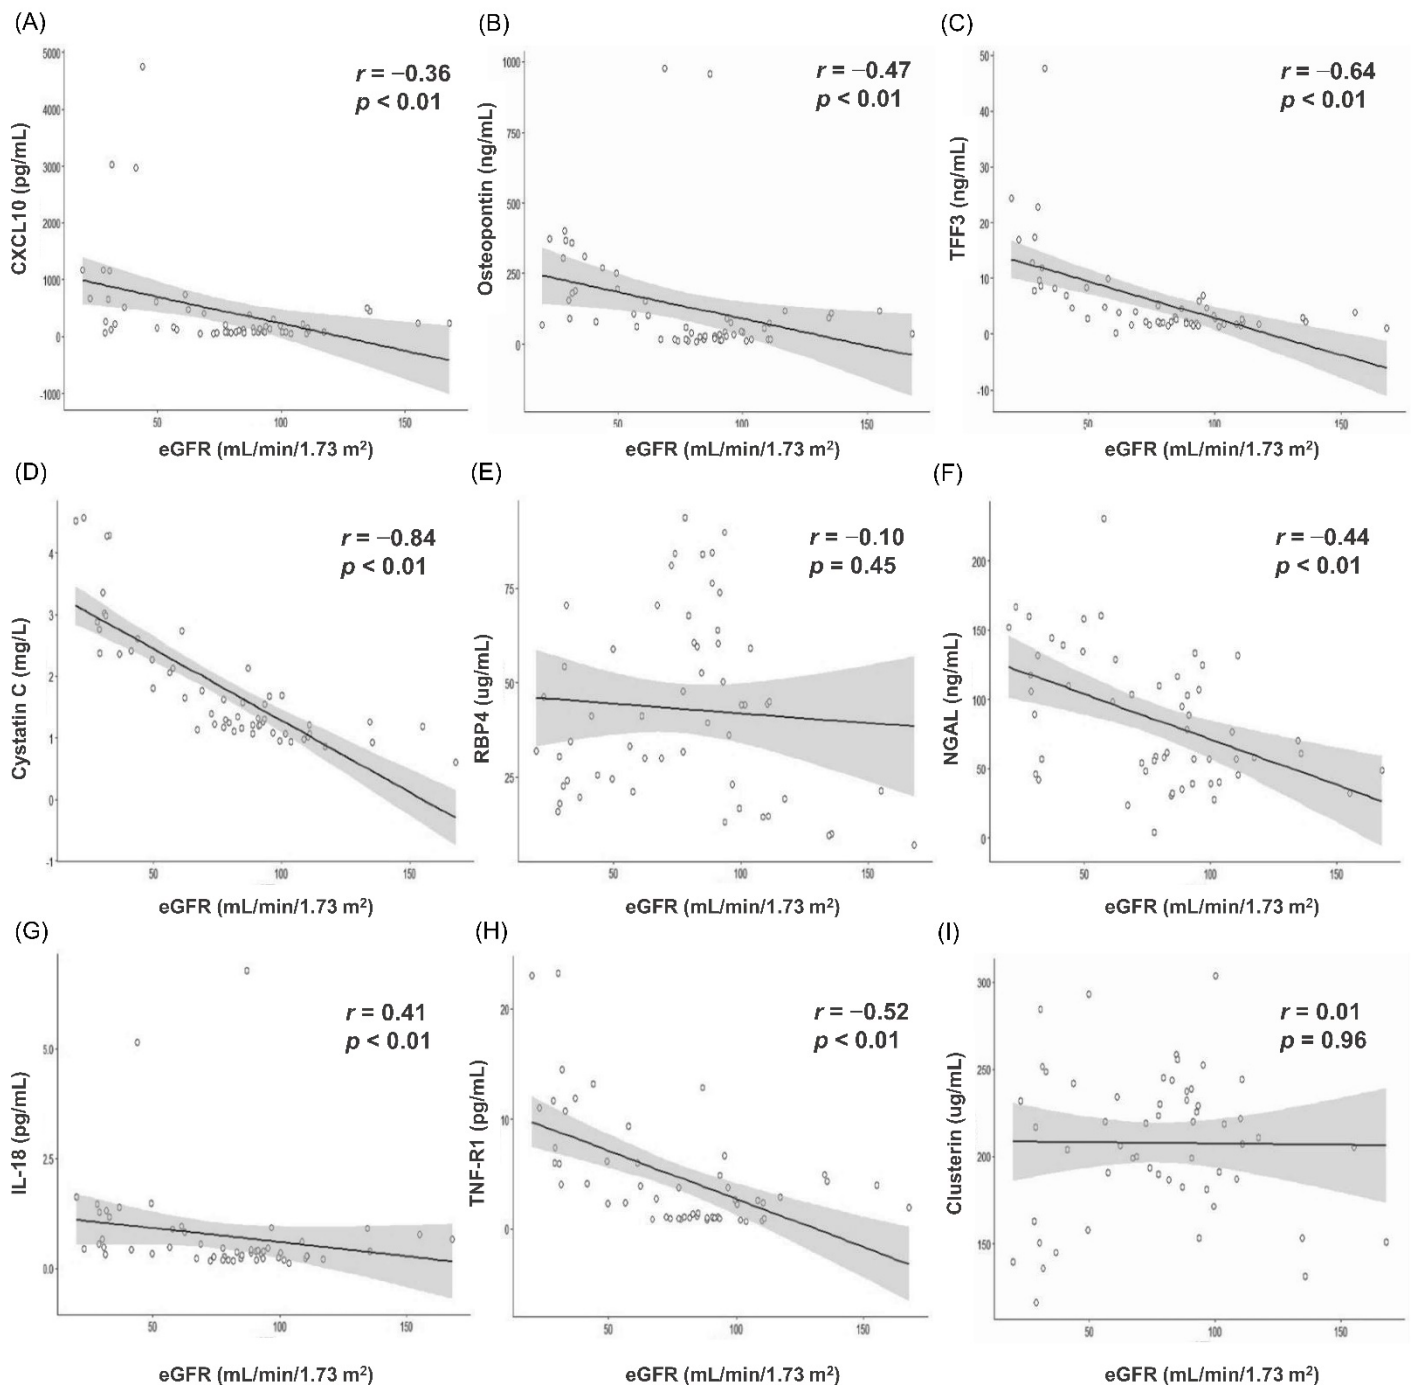

**Figure S1.** Correlation analyses and scatter plots between serum biomarker concentrations and estimated glomerular filtration rate in the screening test (n=55). (A) CXCL10 (B) Osteopontin (C) TFF3 (D) Cystatin C (E) RBP4 (F) NGAL (G) IL-18 (H) TNF-R1 (I) Clusterin. In the scatter plot, the solid line and gray zone represent the regression line and its 95% confidence interval, respectively. The value of r represents the correlation coefficient by Spearman's rho method. Abbreviation: eGFR, estimated glomerular filtration rate; CXCL10, C-X-C motif chemokine ligand 10; TFF3, trefoil factor-3; RBP4, retinol binding protein 4; NGAL, neutrophil gelatinase-associated lipocalin; IL-18, interleukin-18; TNF-R1, tumor necrosis factor receptor 1

**Table S1.** Univariate logistic regression analysis for serum biomarkers and clinical parameters in association with the development of VIKI.

| Independent Variables                | Odds Ratio (95% Confidence interval) | P Value          |
|--------------------------------------|--------------------------------------|------------------|
| Age                                  | 1.010 (0.969-1.053)                  | 0.645            |
| Sex                                  | 0.741 (0.232-2.362)                  | 0.612            |
| BMI                                  | 0.897 (0.754-1.068)                  | 0.223            |
| Hypertension                         | 0.800 (0.236-2.718)                  | 0.721            |
| Diabetes                             | 0.873 (0.226-3.368)                  | 0.843            |
| CRP                                  | 1.033 (0.953-1.119)                  | 0.428            |
| Vancomycin trough concentration      | <0.001 (0.000-0.000)                 | 0.994            |
| Baseline sCr                         | 1.961 (0.186-20.724)                 | 0.576            |
| eGFR                                 | 0.019 (0.000-0.000)                  | 0.994            |
| Duration of vancomycin therapy       | 0.964 (0.904-1.028)                  | 0.260            |
| Use of concomitant nephrotoxic agent | 1.405 (0.448-4.410)                  | 0.560            |
| IL-18                                | 1.001 (0.999-1.002)                  | 0.279            |
| TNF-R1                               | 1.000 (1.000-1.001)                  | 0.003            |
| CXCL10                               | <b>1.003 (1.001-1.006)</b>           | <b>0.017</b>     |
| OPN                                  | 1.000 (1.000-1.000)                  | 0.057            |
| TFF3                                 | 1.000 (1.000-1.000)                  | 0.002            |
| Cystatin C                           | <b>1.003 (1.001-1.004)</b>           | <b>&lt;0.001</b> |
| RBP4                                 | 1.000 (1.000-1.000)                  | 0.783            |
| NGAL                                 | <b>1.007 (1.001-1.013)</b>           | <b>0.016</b>     |

**Note:** *P* value < 0.05 was considered statistically significant. Significant values are indicated in bold.

**Abbreviation:** VIKI, vancomycin-induced kidney injury; BMI, body mass index; CRP, C-reactive protein; eGFR, estimated glomerular filtration rate; sCr, serum creatinine; IL-18, interleukin-18; TNF-R1, tumor necrosis factor receptor 1; CXCL10, C-X-C motif chemokine ligand 10; TFF3, trefoil factor-3; RBP4, retinol binding protein 4; NGAL, neutrophil gelatinase-associated lipocalin.
